# Supplementary material for: Determination of regulatory ionophore coccidiostat residues in feedstuffs at carry-over levels by liquid chromatography-mass spectrometry
Source: PLoS One. 2017 Aug 9;12(8):e0182831. doi: 10.1371/journal.pone.0182831 (PMC5549955; doi:10.1371/journal.pone.0182831)
Supplement: S1 File — (XLSX) [file pone.0182831.s001.xlsx]

## Sheet: samples 
Sample	Geographic origin	Target species	Sampling stage
1	Teramo (Abruzzo)	Chicken	Production line
2	Chieti (Abruzzo)	Chicken	Unopened bag
3	Campobasso (Molise)	Chicken	Manger
4	Teramo (Abruzzo)	Swine	Feed distribution
5	Campobasso (Molise)	Rabbit	Manger
6	Isernia (Molise)	Chicken	Bulk
7	Campobasso (Molise)	Chicken	Bulk
8	Isernia (Molise)	Cattle	Unopened bag
9	Campobasso (Molise)	Chicken	Manger
10	Campobasso (Molise)	Cattle	Unopened bag
11	Campobasso (Molise)	Chicken	Production line
12	Chieti (Abruzzo)	Swine	Bulk
13	Teramo (Abruzzo)	Laying hens	Manger
14	Chieti (Abruzzo)	Rabbit	Manger
15	Teramo (Abruzzo)	Swine	Feed distribution
16	Teramo (Abruzzo)	Swine	Unopened bag
17	Teramo (Abruzzo)	Chicken	Production line
18	Teramo (Abruzzo)	Chicken	Production line
19	Teramo (Abruzzo)	Swine	Unopened bag
20	Teramo (Abruzzo)	Chicken	Production line
21	Teramo (Abruzzo)	Chicken	Production line
22	Teramo (Abruzzo)	Chicken	Unopened bag
23	Teramo (Abruzzo)	Cattle, sheep and swine	Production line
24	L'Aquila (Abruzzo)	Chicken	Unopened bag
25	L'Aquila (Abruzzo)	Swine	Unopened bag
26	Campobasso (Molise)	Cattle	Unopened bag
27	Isernia (Molise)	Cattle	Unopened bag
28	Chieti (Abruzzo)	Cattle	Feed distribution
29	Pescara (Abruzzo)	Sheep	Unopened bag
30	Teramo (Abruzzo)	Chicken	Production line
31	Teramo (Abruzzo)	Chicken	Production line
32	Teramo (Abruzzo)	Cattle	Unopened bag
33	Teramo (Abruzzo)	Chicken	Production line
34	Teramo (Abruzzo)	Chicken	Production line
35	L'Aquila (Abruzzo)	Sheep	Unopened bag
36	L'Aquila (Abruzzo)	Sheep	Unopened bag
37	Campobasso (Molise)	Cattle	Bulk
38	Campobasso (Molise)	Cattle	Unopened bag
39	Isernia (Molise)	Cattle	Unopened bag
40	Isernia (Molise)	Swine	Unopened bag
41	Pescara (Abruzzo)	Chicken	Manger
42	Teramo (Abruzzo)	Rabbit	Bulk
43	L'Aquila (Abruzzo)	Sheep	Unopened bag
44	Campobasso (Molise)	Sheep	Bulk
45	Campobasso (Molise)	Cattle	Unopened bag
46	Campobasso (Molise)	Cattle	Bulk
47	Isernia (Molise)	Sheep	Bulk
48	Isernia (Molise)	Swine	Bulk
49	Isernia (Molise)	Cattle	Bulk
50	Teramo (Abruzzo)	Rabbit	Bulk
51	Chieti (Abruzzo)	Chicken	Unopened bag
52	Isernia (Molise)	Chicken	Unopened bag
53	Campobasso (Molise)	Chicken	Production line
54	Pescara (Abruzzo)	Cattle	Manger
55	Campobasso (Molise)	Cattle	Unopened bag
56	Campobasso (Molise)	Chicken	Bulk
57	Chieti (Abruzzo)	Horse	Unopened bag
58	Chieti (Abruzzo)	Chicken	Feed distribution
59	Teramo (Abruzzo)	Cattle	Unopened bag
60	Teramo (Abruzzo)	Chicken	Bulk
61	Campobasso (Molise)	Cattle	Bulk
62	Chieti (Abruzzo)	Cattle	Unopened bag
63	Campobasso (Molise)	Sheep	Unopened bag
64	Isernia (Molise)	Chicken	Production line
65	Teramo (Abruzzo)	Chicken	Production line
66	L'Aquila (Abruzzo)	Cattle	Bulk
67	Campobasso (Molise)	Rabbit	Bulk
68	Isernia (Molise)	Sheep	Production line
69	Campobasso (Molise)	Chicken	Production line
70	Campobasso (Molise)	Cattle	Production line
71	Campobasso (Molise)	Cattle	Production line
